# Supplementary material for: Liquid extraction surface analysis field asymmetric waveform ion mobility spectrometry mass spectrometry for the analysis of dried blood spots
Source: Royal Society of Chemistry journal article supplement (doi:10.1039/c5an00933b), 2015-01-01
Supplement: c5an00933b1.pdf [file c5an00933b1.pdf]

## Supplemental Figure 2
