# Supplementary material for: Liquid extraction surface analysis field asymmetric waveform ion mobility spectrometry mass spectrometry for the analysis of dried blood spots
Source: Royal Society of Chemistry journal article supplement (doi:10.1039/c5an00933b), 2015-01-01
Supplement: c5an00933b4.pdf [file c5an00933b4.pdf]

## Liquid extraction surface analysis field asymmetric waveform ion mobility spectrometry mass spectrometry for the analysis of dried blood spots

Rian L. Griffiths and Helen J. Cooper\*

School of Biosciences, University of Birmingham, Edgbaston, Birmingham B15 2TT, UK.

\*To whom correspondence should be addressed: [h.j.cooper@bham.ac.uk](mailto:h.j.cooper@bham.ac.uk)

### Supplemental Information

**Supplemental Figure 1.** (A) Total ion transmission map ( $m/z$  vs. compensation field (CF)) obtained following LESA FAIMS mass spectrometry of dried blood spots at DF = 270 Td. (B) The same total ion transmission map is shown with a mean mass spectrum of data acquired during the FAIMS analysis (DF = 270 Td, CF = -1 to 4 Td) overlaid in white.

**Supplemental Figure 2.** Single ion transmission maps showing the 18+ to 13+ charge states of  $\alpha$ -globin ions (A-F) and  $\beta$ -globin ions (G-L) obtained following LESA 2D FAIMS analysis (DF = 130-270 Td, CF = -1-4Td).

**Supplemental Figure 3.** LESA FAIMS HCD MS/MS spectra of lipid species from DBS (DF = 130 Td, CF = 1.8 Td). Precursor ions with  $m/z$  A) 786.6, B) 758.6, C) 782.6 and D) 760.6 all fragment to form the characteristic product ion of phosphatidylcholine lipid species ( $m/z$  184.07).
